# Supplementary material for: Behavioral and physiological fatigue-related factors influencing timing and force control learning in pianists
Source: PubMed Central journal article supplement (PMC10703774; doi:10.1038/s41598-023-49226-7), 2023-12-08
Supplement: 41598_2023_49226_MOESM1_ESM.pdf [file 41598_2023_49226_MOESM1_ESM.pdf]

# Behavioral and physiological fatigue-related factors influencing timing and force control learning in pianists

## Authors

Mitsuaki Takemi<sup>1#</sup>, Mai Akahoshi<sup>2,3#</sup>, Junichi Ushiba<sup>3</sup>, Shinichi Furuya<sup>2</sup>

## Affiliations

<sup>1</sup>Graduate School of Science and Technology, Keio University, Kanagawa, Japan;

<sup>2</sup>Sony Computer Science Laboratories, Inc., Tokyo, Japan;

<sup>3</sup>Department of Biosciences and Informatics, Faculty of Science and Technology, Keio University, Kanagawa, Japan;

#Equally- contributed co-first authors

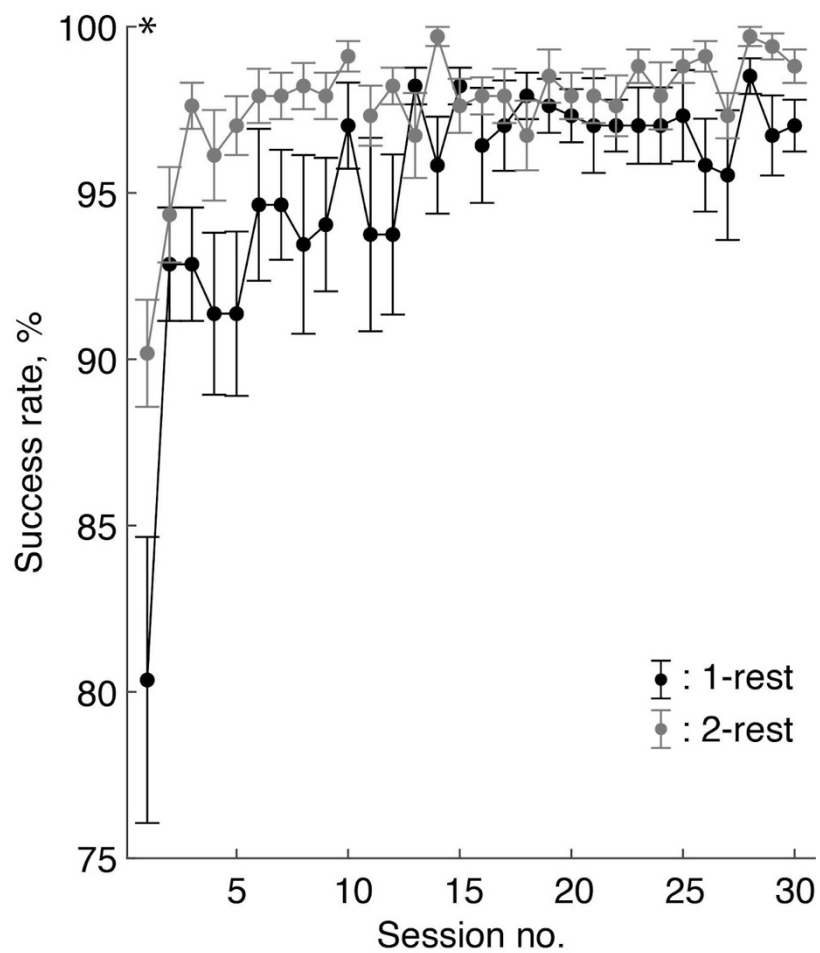

**Supplementary figure 1.** Task success rate across the training sessions. The filled dots and error bars represent the mean and standard error of the mean, respectively. \*:  $p < 0.05$  by post-hoc pairwise comparisons.
